# Supplementary material for: Gene Expression Analysis of the Pre-Diabetic Pancreas to Identify Pathogenic Mechanisms and Biomarkers of Type 1 Diabetes
Source: PubMed Central journal article supplement (PMC7793767; doi:10.3389/fendo.2020.609271), 2020-12-23
Supplement: Image_1.pdf [file Image_1.pdf]

# Supplementary Fig. 1

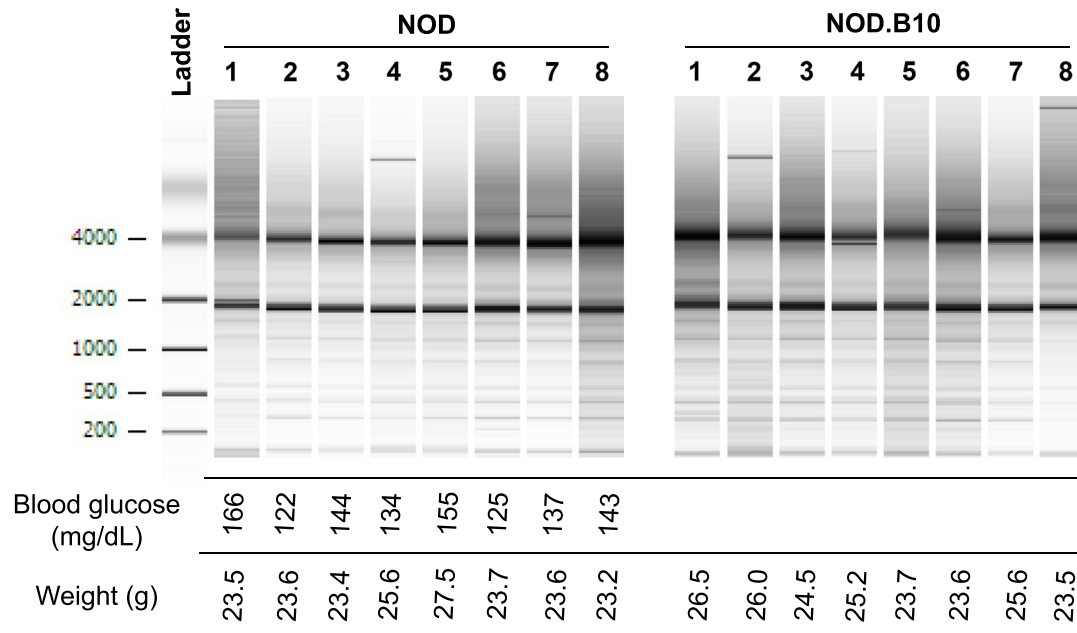

**Supplementary Fig. 1** Bioanalyzer traces of RNA samples extracted from the pancreas of 12 week old NOD and NOD.B10 mice (n=8/group) are shown, along with body weights, and the blood glucose measurements taken from NOD mice prior to sacrifice.
