# Supplementary material for: Gene Expression Analysis of the Pre-Diabetic Pancreas to Identify Pathogenic Mechanisms and Biomarkers of Type 1 Diabetes
Source: PubMed Central journal article supplement (PMC7793767; doi:10.3389/fendo.2020.609271), 2020-12-23
Supplement: Image_3.pdf [file Image_3.pdf]

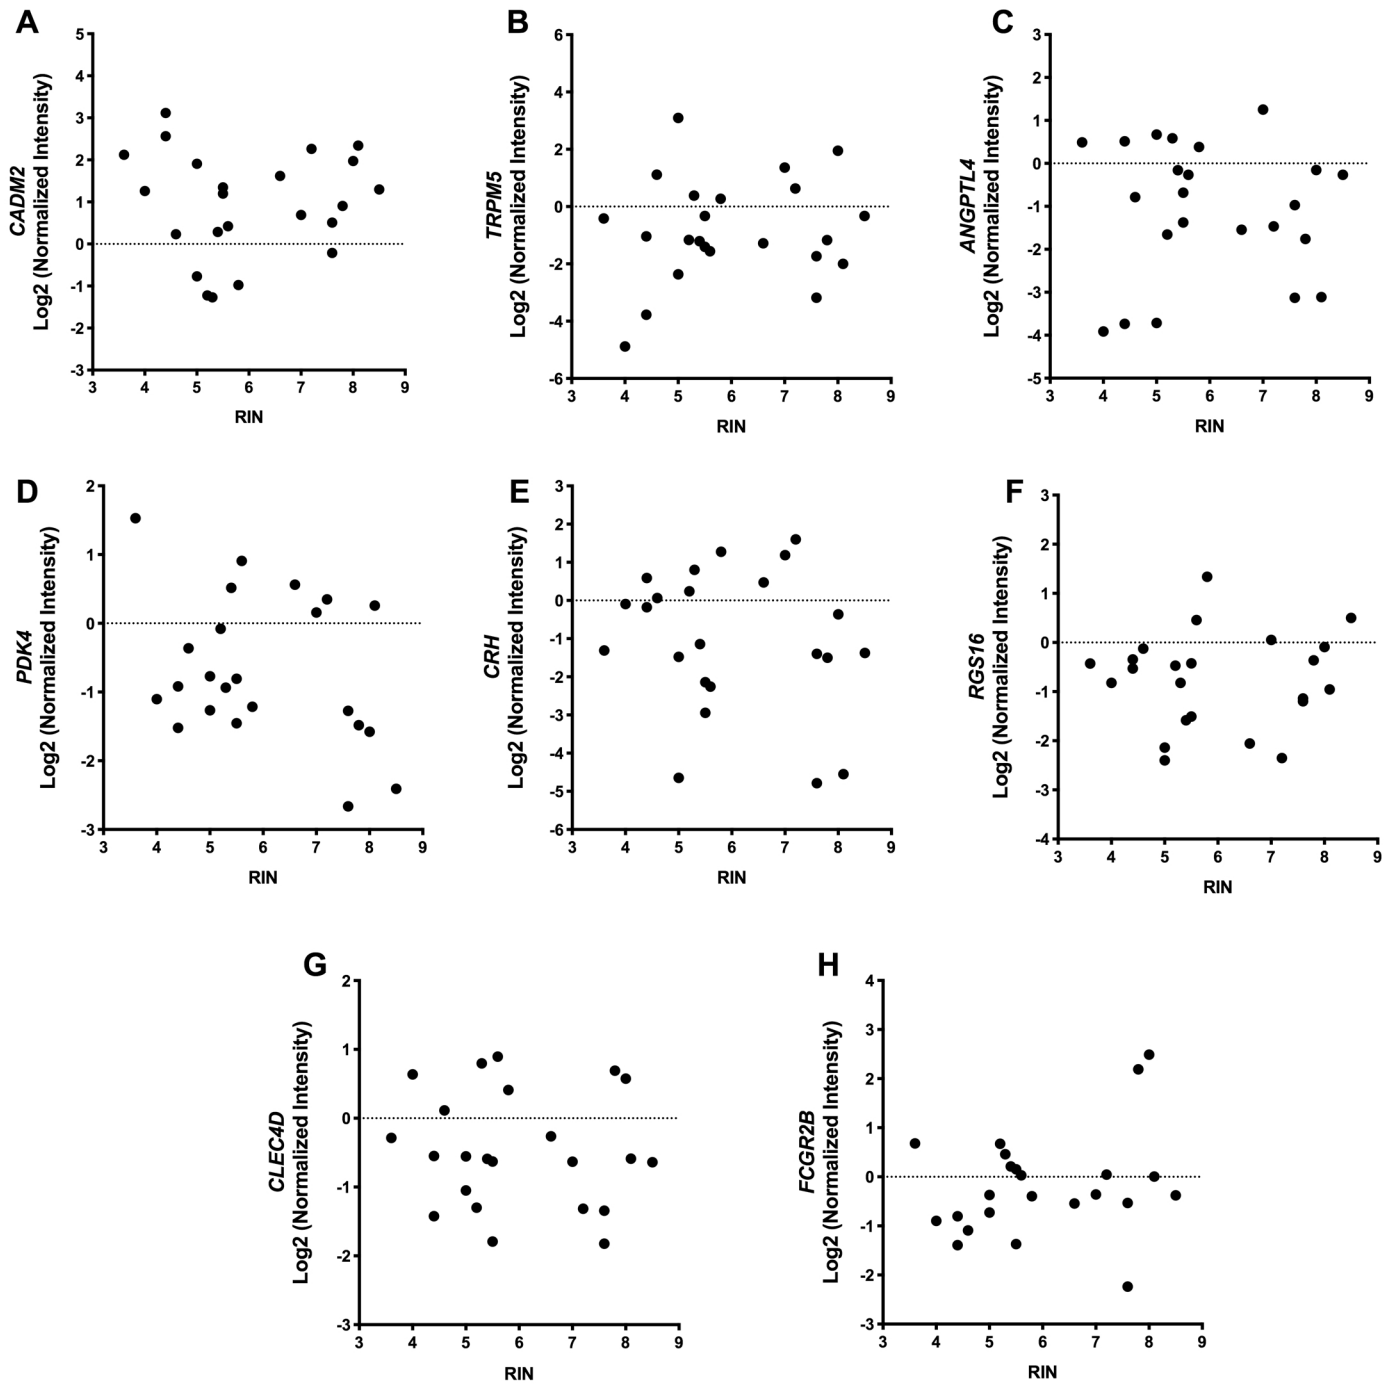

**Supplementary Fig. 3.** Expression of genes that are differentially expressed in the pancreata of AA+ individuals vs. control, as measured by microarray analysis and shown relative to the RIN value of each sample.
