# Supplementary material for: Gene Expression Analysis of the Pre-Diabetic Pancreas to Identify Pathogenic Mechanisms and Biomarkers of Type 1 Diabetes
Source: PubMed Central journal article supplement (PMC7793767; doi:10.3389/fendo.2020.609271), 2020-12-23
Supplement: Table_4.pdf [file Table_4.pdf]

Supplementary Table 4: QPCR cycle threshold values of differentially expressed genes in the pancreata of AA+ vs. controls

cDNA prep 1

|         | ID   | <i>ACTB</i> | <i>ANGPTL4</i> | <i>CRH</i> | <i>CLEC4D</i> | <i>RGS16</i> | <i>CD19</i> | <i>CD20</i> | <i>CD11c</i> |
|---------|------|-------------|----------------|------------|---------------|--------------|-------------|-------------|--------------|
| Control | 6172 | 27.79       | 17.16          | 23.75      | 27.34         | 27.32        | 32.76       | 25.34       | 25.28        |
|         | 6179 | 26.75       | 18.95          | 23.38      | 26.87         | 28.13        | 31.50       | 23.73       | 21.64        |
|         | 6227 | 25.58       | 18.31          | 25.57      | 25.71         | 27.98        | 32.48       | 24.95       | 22.16        |
|         | 6229 | 26.70       | 16.38          | 23.36      | 27.49         | 28.47        | 33.47       | 26.95       | 26.06        |
|         | 6234 | 27.64       | 18.14          | 25.93      | 28.73         | 29.28        | n.d.        | 27.38       | 27.42        |
|         | 6253 | 25.92       | 16.86          | 23.37      | 24.65         | 28.89        | 33.66       | 25.78       | 22.01        |
| AA+     | 6027 | 27.39       | 23.18          | 26.37      | 29.32         | 29.56        | n.d.        | 28.72       | 26.30        |
|         | 6090 | 25.23       | 18.48          | 26.71      | 26.78         | 28.96        | 30.83       | 24.03       | 23.18        |
|         | 6123 | 26.46       | 20.75          | 26.62      | 27.74         | 29.82        | 33.46       | 26.79       | 23.72        |
|         | 6170 | 26.24       | 18.71          | 31.02      | 28.40         | 30.07        | 32.56       | 25.91       | 24.61        |
|         | 6184 | 27.63       | 18.12          | 24.72      | 28.51         | 29.70        | 33.91       | 26.32       | 24.39        |
|         | 6197 | 24.74       | 20.69          | 27.41      | 27.52         | 29.16        | 30.14       | 22.54       | 24.28        |
| T1D     | 6088 | 25.97       | 19.08          | 26.46      | 27.44         | 29.76        | 22.14       | 15.68       | 24.86        |
|         | 6143 | 24.39       | 17.01          | 25.56      | 25.21         | 27.21        | 31.31       | 22.02       | 22.81        |
|         | 6148 | 29.97       | 22.97          | 27.21      | 29.03         | 31.21        | n.d.        | 27.42       | 27.07        |
|         | 6161 | 25.54       | 16.61          | 25.66      | 26.78         | 30.92        | 32.79       | 26.06       | 26.08        |
|         | 6180 | 27.49       | 23.21          | 25.92      | 27.39         | 30.08        | 33.64       | 24.44       | 23.30        |
|         | 6241 | 24.50       | 17.26          | 24.35      | 24.81         | 28.41        | 20.60       | 15.09       | 22.65        |
|         | 6245 | 26.20       | 18.65          | 22.79      | 28.08         | 30.76        | 30.65       | 23.47       | 25.35        |
|         | 6258 | 27.99       | 17.60          | 23.99      | 25.89         | 29.69        | 29.56       | 23.84       | 25.60        |
|         | 6263 | 24.00       | 18.70          | 25.52      | 23.74         | 27.95        | 28.95       | 21.45       | 19.88        |
|         | 6266 | 26.21       | 19.11          | 23.83      | 26.78         | 30.57        | 31.76       | 24.33       | 24.72        |

cDNA prep 2

|         | ID   | <i>ACTB</i> | <i>TRPM5</i> | <i>PDK4</i> | <i>FCGR2B</i> |
|---------|------|-------------|--------------|-------------|---------------|
| Control | 6172 | 25.99       | 25.46        | 24.55       | 27.15         |
|         | 6179 | 23.97       | 26.85        | 26.04       | 24.46         |
|         | 6227 | 23.40       | 26.45        | 26.53       | 24.22         |
|         | 6229 | 24.06       | 26.30        | 23.50       | 25.80         |
|         | 6234 | 26.03       | 26.97        | 26.30       | 25.38         |
|         | 6253 | 23.64       | 28.17        | 24.51       | 25.65         |
| AA+     | 6027 | 25.56       | 28.73        | 29.61       | 29.80         |
|         | 6090 | 23.95       | 27.78        | 25.66       | 30.05         |
|         | 6123 | 25.12       | 29.24        | 27.99       | 28.64         |
|         | 6170 | 22.97       | 28.19        | 26.27       | 29.34         |
|         | 6184 | 25.01       | 27.93        | 26.97       | 25.52         |
|         | 6197 | 22.17       | 28.27        | 26.16       | 25.50         |
| T1D     | 6088 | 25.51       | 28.72        | 26.52       | 24.84         |
|         | 6143 | 22.03       | 29.27        | 24.73       | 25.93         |
|         | 6148 | 29.69       | 28.09        | 28.61       | 25.26         |
|         | 6161 | 22.06       | 27.45        | 20.97       | 23.89         |
|         | 6180 | 25.71       | 28.40        | 30.63       | 26.29         |
|         | 6241 | 23.17       | 26.03        | 22.28       | 22.47         |
|         | 6245 | 23.95       | 25.08        | 24.37       | 26.00         |
|         | 6258 | 23.91       | 29.48        | 25.88       | 22.62         |
|         | 6263 | 21.79       | 27.34        | 25.45       | 24.40         |
|         | 6266 | 22.07       | 26.98        | 25.79       | 27.07         |

cDNA prep 3

|         | ID   | <i>ACTB</i> | <i>18S</i> | <i>GAPDH</i> | <i>CADM2</i> |
|---------|------|-------------|------------|--------------|--------------|
| Control | 6172 | 27.07       | 13.88      | 27.98        | 29.22        |
|         | 6179 | 26.31       | 13.53      | 25.84        | 28.91        |
|         | 6227 | 25.81       | 14.81      | 26.34        | 28.83        |
|         | 6229 | 26.37       | 13.87      | 26.63        | 28.16        |
|         | 6234 | 28.73       | 15.43      | 28.23        | 29.34        |
|         | 6253 | 26.01       | 14.16      | 26.02        | 30.26        |
| AA+     | 6027 | 27.85       | 14.54      | 27.67        | 27.76        |
|         | 6090 | 26.29       | 14.55      | 26.90        | 27.33        |
|         | 6123 | 27.57       | 15.52      | 26.72        | 27.15        |
|         | 6170 | 25.44       | 13.46      | 27.17        | 27.21        |
|         | 6184 | 27.44       | 14.72      | 27.93        | 26.94        |
|         | 6197 | 24.31       | 13.20      | 24.63        | 25.04        |
| T1D     | 6088 | 27.09       | 14.51      | 27.38        | 26.89        |
|         | 6143 | 24.72       | 13.32      | 24.45        | 25.51        |
|         | 6148 | 29.84       | 14.95      | 30.43        | 30.29        |
|         | 6161 | 24.61       | 13.16      | 25.24        | 26.01        |
|         | 6180 | 27.13       | 14.88      | 28.09        | 29.15        |
|         | 6241 | 25.21       | 14.26      | 26.05        | 26.13        |
|         | 6245 | 26.31       | 13.85      | 25.86        | 25.78        |
|         | 6258 | 26.55       | 13.61      | 25.41        | 28.48        |
|         | 6263 | 23.96       | 13.59      | 24.86        | 27.11        |
|         | 6266 | 24.69       | 11.88      | 24.21        | 26.16        |
